# Supplementary material for: Red wine consumption activates the erythropoietin–erythroferrone–hepcidin erythropoietic pathway in both apparently healthy individuals and patients with type 2 diabetes
Source: Royal Society of Chemistry journal article supplement (doi:10.1039/d4fo04555f), 2025-01-01
Supplement: d4fo04555f1.xlsx [file d4fo04555f1.xlsx]

## Sheet: Laboratory
ID	Group	Stage	ALT [IU/L]	AST [IU/L]	Albumin [g/L]	Total bilirubin [µmol/L]	Erythropoietin [mlU/mL]	Erythroferrone [ng/mL]	RBC [x 1012/L]	Ferritin [ng/mL]	GGT [IU/L]	Fasting glucose [mmol/L]	Hematocrit [L/L]	Hemoglobin [g/L]	Hepcidin [ng/mL]	RDW [%]	Creatinine [µmol/L]	MCH [pg]	MCHC [g/L]	MCV [fL]	Reticulocytes [x109/L]	Transferrin saturation [%]	TIBC [µmol/L]	UIBC [µmol/L]	Urea [mmol/L]	Urates [µmol/L]	Serum iron [µmol/L]	hsCRP [mg/L]	sTFR [mg/L]
AH	diabetics	Baseline	30	24	46	13	7.505	0.094	4.57	205	20	5.9	0.426	142	17.647	13.6	75	31	332	93.3	45.5	27.48	52.4	38	5.1	403	14.4	1.3	0.945
AH	diabetics	Wine	31	24	40	6	8.903	0.119	4.6	168	17	6.6	0.437	144	8.287	13.9	64	31.2	329	95	58	21.65	48.5	38	4.1	325	10.5	0.7	0.893
AJ_2	diabetics	Baseline	51	28	43	25	4.017	0	5.52	196	34	9.7	0.455	156	26.927	13.4	66	28.4	344	82.5	63.6	37.87	57.3	35.6	5.2	457	21.7	1.5	1.06
AJ_2	diabetics	Wine	41	26	43	25	6.223	0	5.47	174	30	9	0.455	155	16.421	13.6	66	28.3	340	83.1	84.3	28.52	58.9	42.1	5.4	418	16.8	1.3	0.996
BJ_2	diabetics	Baseline	16	19	45	14	9.339	0.17	5.27	110	16	7.3	0.488	161	14.12	14.1	87	30.6	331	92.6	47.8	26.05	52.2	38.6	7	292	13.6	0.9	1.04
BJ_2	diabetics	Wine	21	19	44	9	12.676	0	5.13	156	27	6.9	0.468	161	25.12	13.9	102	31.5	345	91.2	48.5	32.67	55.4	37.3	7.5	295	18.1	0.8	0.918
DB	diabetics	Baseline	42	28	42	10	9.988	0	5.18	128	33	6.7	0.434	145	11.359	14.1	90	28.1	335	83.8	52	26.56	51.2	37.6	4.1	466	13.6	2.5	0.723
DB	diabetics	Wine	43	26	41	11	8.318	0	5.26	120	36	5.5	0.444	151	8.215	14.1	85	28.7	339	84.4	56.9	27.47	51.7	37.5	4.9	450	14.2	4	0.771
DB_2	diabetics	Baseline	12	16	42	7	4.98	0	4.87	46.3	36	10.1	0.446	153	3.67	13.4	70	31.5	344	91.5	57.4	21.78	68.4	53.5	5.4	274	14.9	1.9	1.06
DB_2	diabetics	Wine	9	17	42	9	12.186	0.094	4.67	25.6	41	8	0.421	145	1.03	13.7	66	31.1	345	90.2	82.5	22.61	68.1	52.7	4.6	257	15.4	1.7	1
DJ_2	diabetics	Baseline	26	20	44	9	8.758	0	4.34	207	25	9.7	0.408	144	28.682	12.7	78	33.2	354	94	26.8	28.93	71.2	50.6	3.6	309	20.6	1.4	0.839
DJ_2	diabetics	Wine	16	16	43	8	11.976	0.046	4.3	179	22	9.2	0.397	139	20.056	12.8	71	32.3	350	92.2	44.4	30.96	68.8	47.5	4.2	334	21.3	1.7	0.821
GB_2	diabetics	Baseline	24	21	43	14	8.538	0	5.27	76.2	26	5.9	0.468	160	8.507	12.6	92	30.3	341	88.9	37.2	22.64	66.7	51.6	5.7	303	15.1	1.4	0.926
GB_2	diabetics	Wine	36	26	45	14	8.831	0.144	5.13	57.8	32	6.2	0.446	155	4.44	12.7	92	30.2	347	87.1	81	32.72	70.3	47.3	5.9	303	23	1.2	1.11
JG	diabetics	Baseline	29	20	41	13	6.83	0.022	4.79	246	22	6.8	0.434	147	15.824	13.4	66	30.8	339	90.6	56.8	37.81	60.3	37.5	5.2	313	22.8	0.4	1.44
JG	diabetics	Wine	30	21	40	15	8.245	0.195	5.1	256	32	6.9	0.46	154	11.394	13.9	64	30.2	335	90.2	79.3	34.84	64	41.7	4.8	386	22.3	0.4	1.48
MB	diabetics	Baseline	48	28	41	8	7.056	0.272	4.8	356	53	7.6	0.442	150	18.21	13.3	90	31.3	340	91.9	81.6	35.12	50.4	32.7	5.7	543	17.7	1.8	1.11
MB	diabetics	Wine	33	23	41	9	5.761	0.144	4.99	277	39	7.4	0.454	157	14.762	13	90	31.4	345	91	97.1	37.5	47.2	29.5	6.2	460	17.7	1.7	1.11
MG	diabetics	Baseline	16	19	42	18	2.671	0.022	5.04	244	27	8.3	0.446	154	20.883	13.6	78	30.5	344	88.6	56.4	30.09	53.5	37.4	7.6	275	16.1	0.8	1.04
MG	diabetics	Wine	18	18	39	19	5.059	0	5.24	201	28	6.8	0.474	162	13.703	13.7	68	31	342	90.5	60.3	23.11	54.1	41.6	7.5	287	12.5	1.2	1.03
ML	diabetics	Baseline	16	21	43	14	5.216	0	4.79	424	31	6.5	0.422	144	58.072	14.1	88	30.1	342	88.1	49.8	22.74	51.9	40.1	7.2	381	11.8	0.7	1.2
ML	diabetics	Wine	16	17	40	11	8.903	0.298	4.87	459	38	6.7	0.43	145	41.371	14.4	93	29.8	337	88.3	70.6	21.99	53.2	41.5	8.1	374	11.7	1.3	1.25
ML_2	diabetics	Baseline	22	23	44	10	7.654	0	5.03	282	20	8.2	0.428	147	53.88	13.9	83	29.3	343	85.2	70.1	26.79	61.6	45.1	4.9	362	16.5	3.3	1.19
ML_2	diabetics	Wine	21	25	45	9	12.046	0.022	4.94	241	21	8.1	0.418	144	32.748	13.9	89	29.2	344	84.7	78	24.56	61.9	46.7	8.1	389	15.2	4.2	1.33
NK	diabetics	Baseline	28	19	49	13	8.098	0	5.25	52.4	19	7	0.455	155	7.423	13.4	85	29.5	340	86.6	65.8	21.87	66.3	51.8	7	363	14.5	0.5	1.14
NK	diabetics	Wine	32	22	48	14	6.981	0	5.16	49.4	21	6.6	0.453	151	6.053	13.9	95	29.3	334	87.8	74.4	24.42	65.1	49.2	5.6	365	15.9	0.5	1.09
SR_2	diabetics	Baseline	27	19	45	17	11.058	0	4.92	598	28	5.6	0.472	161	73.74	13.1	85	32.6	340	95.9	40.8	25.82	54.6	40.5	5.6	352	14.1	6.2	1.06
SR_2	diabetics	Wine	29	25	43	13	12.116	0.195	4.62	573	27	5.6	0.443	153	19.537	13.3	75	33.1	345	95.9	48.2	60.34	53.7	21.3	5.9	308	32.4	0.7	1.25
SU_2	diabetics	Baseline	17	16	40	6	20.19	0.07	4.78	227	21	8.3	0.43	147	19.767	13.8	82	30.8	342	90.1	62.1	22.2	48.2	37.5	9.6	348	10.7	11.5	1.13
SU_2	diabetics	Wine	20	21	41	9	13.165	0.195	4.84	247	25	8.5	0.432	151	15.256	13.7	80	31.3	350	89.3	67.7	25.56	48.9	36.4	6.9	353	12.5	12	1.18
TK_2	diabetics	Baseline	14	17	41	12	7.281	12.041	5	59.4	13	6.4	0.443	152	12.779	13	93	30.5	344	88.6	63.3	48.89	58.3	29.8	6.6	341	28.5	0.6	0.798
TK_2	diabetics	Wine	20	23	42	15	12.116	8.003	4.91	60.2	15	6	0.428	147	6.947	13	90	29.9	343	87.2	65.1	50.33	60	29.8	7.3	378	30.2	0.9	0.799
ZL_2	diabetics	Baseline	71	34	44	12	6.299	0.07	4.97	156	139	7.4	0.45	158	22.688	13.8	84	31.7	350	90.5	80.2	29.69	65	45.7	7.1	462	19.3	3.1	1.21
ZL_2	diabetics	Wine	78	38	44	11	8.024	0.376	4.63	114	127	6.2	0.425	152	12.779	14.1	73	32.9	359	91.7	54	30.48	66.6	46.3	5.9	365	20.3	0.3	0.979
ZV	diabetics	Baseline	25	26	39	8	13.651	0.022	4.71	158	15	8.4	0.44	150	9.828	13.5	65	31.8	341	93.4	86.5	20.44	50.4	40.1	8.8	228	10.3	3.9	0.938
ZV	diabetics	Wine	15	17	40	9	13.859	0.272	5.12	220	20	11	0.475	161	11.018	13.4	81	31.5	340	92.8	84.7	30.12	50.8	35.5	7.4	299	15.3	2.2	0.737
bs	healthy	Baseline	25	23	44	11	13.928	0.246	5.11	18	24	5.3	0.433	147	0.895	13.1	82	28.8	340	84.8		23.53	68	52	6.5	275	16	0.5	1.55
bs	healthy	Wine	19	20	45	13	16.264	0.481	5.02	16	27	5.5	0.424	145		12.9	84	28.8	341	84.5		22.97	74	57	7.2	329	17	0.7	1.6
dć	healthy	Baseline	26	28	45	11	9.556	0	5.52	141	18	5.7	0.447	163	20.03	12.8	81	29.5	341	86.3		40	35	9	6.5	342	14	2.1	1.28
dć	healthy	Wine	15	20	45	10	12.467	0.298	5.27	115	17	5.8	0.453	155	33.71	13.1	101	29.3	341	85.8		37.5	24	15	5.5	344	9	4.9	0.791
gg	healthy	Baseline	44	43	49	9	10.346	0.022	5.46	78	58	5.3	0.478	163	10.088	12.3	76	29.8	340	87.6		34.85	66	43	5.7	350	23	0.7	1.16
gg	healthy	Wine	37	24	45	7	12.537	0.508	5.13	63	60	5.7	0.445	154	7.539	12.5	82	30	346	86.7		21.88	64	50	5.3	343	14	0.6	1.3
ip	healthy	Baseline	58	31	45	13	5.529	0	5.75	661	131	5.4	0.486	163	73.42	13.1	73	28.3	334	84.5		44.68	47	26	6.2	381	21	2.3	1.38
ip	healthy	Wine	42	33	44	10	8.538	0	5.59	625	92	5.5	0.472	159	43.06	13.1	72	28.5	337	84.4		34.88	43	28	4.1	342	15	3.1	1.34
kg	healthy	Baseline	24	21	46	11	11.553	0.022	5.14	184	27	5.4	0.427	146	19.09	12.4	92	28.5	342	83.1		34.78	46	30	8.4	299	16	2	1.23
kg	healthy	Wine	24	23	43	13	12.676	0	4.99	140	31	5.4	0.436	146	25.32	12.6	93	29.3	335	87.3		44.68	47	26	6.1	347	21	1.5	1.33
mb	healthy	Baseline	28	34	49	13	10.774	0.298	4.46	234	23	5.2	0.389	134	35.35	12.7	67	30	345	87.1		33.93	56	37	5.3	383	19	0.9	1.12
mb	healthy	Wine	26	24	47		11.765	0.272	4.24	204	28	5.6	0.375	134	18.71	13	67	31.6	357	88.5		27.45	51	37	5.8	430	14	1.2	1.2
mp	healthy	Baseline	21	19	45	19	12.676	0.022	4.88	167	35	5.1	0.445	146	21.54	13	86	30	329	91.2		28.33	60	43	6.1	330	17	1.8	1.19
mp	healthy	Wine	21	21		22	15.58	0.246	4.85	118	42	5.8	0.449	147	13.18	13.5	98	30.2	327	92.4		32.79	61	41	5.9	359	20	4.1	1.2
pd	healthy	Baseline	19	25	42	12	13.165	0	5.24	140	28	6	0.487	158	27.7	12.6	65	30.1	324	93		42.37	59	34	4.6	279	25	1.6	1.53
pd	healthy	Wine	21	27	40	10	12.956	0.144	5.05	98	26	5	0.47	155	8.158	13.1	66	30.7	329	93.1		26.42	53	39	3.8	283	14	0.6	1.4
rb	healthy	Baseline	20	20	45	19	11.976	0.402	4.51	111	9	4.8	0.402	139	36.74	13.8	79	30.9	346	89.2		69.39	49	15	4.6	287	34	0.3	0.825
rb	healthy	Wine	29	26	45		12.607	0	4.58	90	10	5.4	0.416	140	18.21	14	80	30.6	337	90.8		54.72	53	24	4.6	348	29	2	0.875
rp	healthy	Baseline	35	30	46	17	5.059	0.195	6.08	191	30	5.4	0.517	174	45.25	12.9	78	28.6	337	85		60.34	58	24	5.4	344	35	1.3	1.06
rp	healthy	Wine	38	32	42	16	6.527	0	5.54	91	33	5.4	0.464	162	20.34	12.8	88	29.3	350	83.7		34.55	55	36	5.3	347	19	0.7	1.46
sš	healthy	Baseline	16	23	45	14			5.21	442	25	5	0.488	161	27.76	13.1		30.9	330	93.7		31.11	45	31		261	14	1.6
sš	healthy	Wine	19	20	45	26	14.618	0.046	5.55	520	29	6.2	0.52	172	35.72	13.1	100	31.1	332	93.6		46.15	52	28	9.2	297	24	2.9	1.5
tt	healthy	Baseline	68	34	45	9	6.299	0.07	5.14	173	39	4.9	0.443	149	10.49	14.1	69	29	337	86.2		35.09	57	37	4	365	20	1.1	0.919
tt	healthy	Wine	71	35	45	9	12.537	0.272	5.24	141	40	6.6	0.454	156	3.889	14.2	65	29.8	344	86.6		40.62	64	38	4.8	332	26	0.9	0.896
žč	healthy	Baseline	19	21	45	21	5.761	0	5.54	289	49	6.1	0.485	169	32.28	13	83	30.6	349	87.6		49.15	59	30	5.7	380	29	0.6	1.18
žč	healthy	Wine	16	17	42	25	7.876	0	5.48	265	52	5.8	0.478	165	24.58	13.2	86	30.2	346	87.2		56.9	58	25	6.3	399	33	0.5	1.28

## Sheet: Anthropometry
ID	Group	Age [years]	Age at T2D onset [years]	Weight [kg]	Height [cm]	Waist circumference [cm]	Hip circumference [cm]	Upper arm circumference [cm]	Neck circumference [cm]	BMI [kg/m2]
sš	healthy	50	NA	77	180	86	95	31	41	23.7654
dć	healthy	42	NA	114.5	192	111	113	41	44	31.0601
rp	healthy	57	NA	105.3	194	110	111	32.5	41	27.9785
gg	healthy	46	NA	101	183	109	110	36	43	30.1592
pd	healthy	52	NA	83.2	185	90	104	32	37	24.3097
ip	healthy	52	NA	102	194	106	111	36	43	27.1017
žč	healthy	60	NA	100.3	185	104	111	37	45	29.3061
tt	healthy	45	NA	90	187	106	111	36	45	25.7371
rb	healthy	47	NA	76	183	87	104	32	41	22.694
kg	healthy	44	NA	106	185	106	116	39	44	30.9715
mp	healthy	56	NA	86	183	107	104	35	39.5	25.6801
bs	healthy	58	NA	105.8	197	114	111	35	42	27.2617
mb	healthy	47	NA	90	180	101	103	35	39	27.7778
JG	diabetics	57	56	77	170	100	96	30	36	26.6436
MG	diabetics	50	49	86	186	93	92	36	39	24.8584
ZV	diabetics	61	51	82	169	110	106	32	38	28.7105
ML	diabetics	61	59	95.5	171.5	109	103	38.5	45	32.4695
NK	diabetics	44	34	108	193	110	106	34	42	28.9941
MB	diabetics	58	51	107	182	114	113	34	39	32.3029
DB	diabetics	40	40	148.3	207	127	115	37	50	34.6099
AH	diabetics	58	55	97	182	105	102.5	33	39	29.2839
SU_2	diabetics	56	47	107	178	115	112	31	37	33.771
ML_2	diabetics	51	50	132	196	117	115	34	46	34.3607
ZL_2	diabetics	56	55	89	188	98	100	27	37	25.1811
GB_2	diabetics	50	46	96	180	96	101	31	37	29.6296
AJ_2	diabetics	49	44	149	195	132	120	34	45	39.1847
BJ_2	diabetics	64	59	101	190	104	101	30	40	27.9778
SR_2	diabetics	60	59	77	173	90	99	27	36	25.7276
DJ_2	diabetics	58	52	100	183	110	104	34	38	29.8606
DB_2	diabetics	56	53	83	191	90	98	27	35	22.7516
TK_2	diabetics	53	50	102	186	101	107	30	38	29.4832
